# Supplementary material for: Near-infrared-emitting CIZSe/CIZS/ZnS colloidal heteronanonail structures
Source: Royal Society of Chemistry journal article supplement (doi:10.1039/d0nr02777d), 2020-01-01
Supplement: d0nr02777d1.pdf [file d0nr02777d1.pdf]

## Supplementary Material

### Near-Infrared-Emitting CIZSe/CIZS/ZnS Colloidal Heteronanonail Structures

Xue Bai,<sup>a</sup> Finn P. Milton<sup>a</sup> and Yurii K. Gun'ko<sup>\*a,b</sup>

<sup>a</sup> School of Chemistry and CRANN institute, University of Dublin, Trinity College, Dublin, D02, Ireland. Email: igounko@tcd.ie

<sup>b</sup> BEACON, Bioeconomy SFI Research Centre, University College Dublin, Dublin 4, Ireland

<sup>c</sup> ITMO University, St. Petersburg 197101, Russia.

Corresponding Author: \*E-mail: igounko@tcd.ie

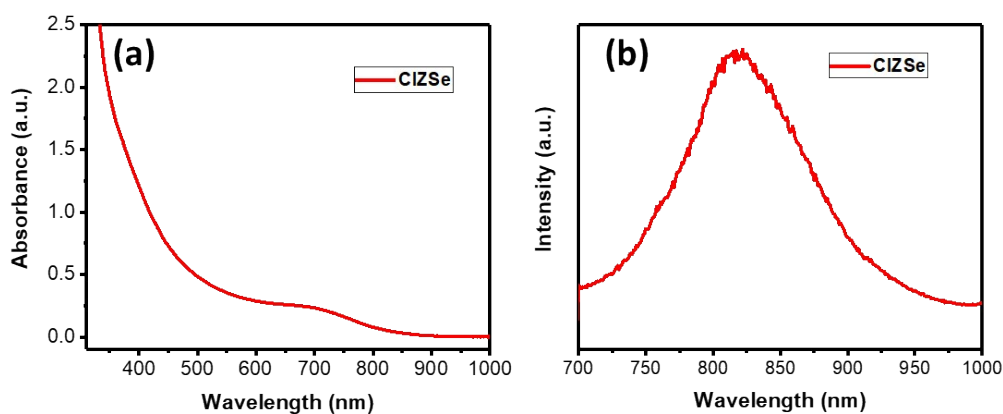

**Fig S1.** (a) The UV-Vis spectrum, (b) PL spectrum of colloidal CIZSe QDs.

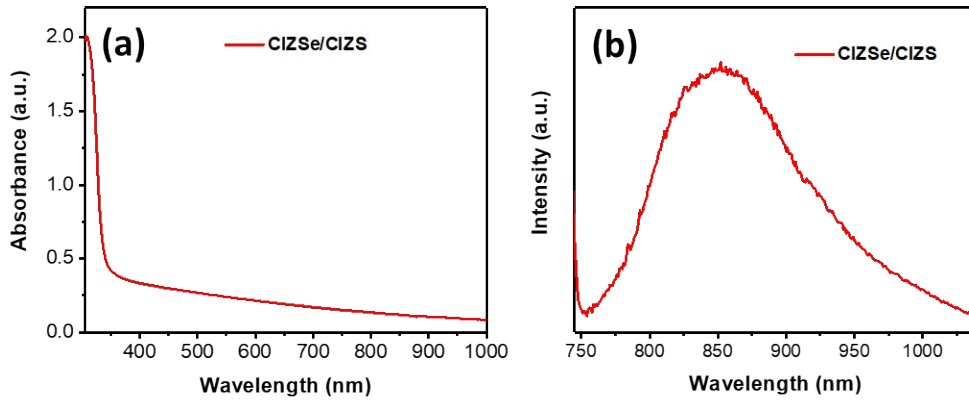

**Fig S2.** (a) UV-Vis and (b) PL spectra of CIZSe/CIZS QDs.

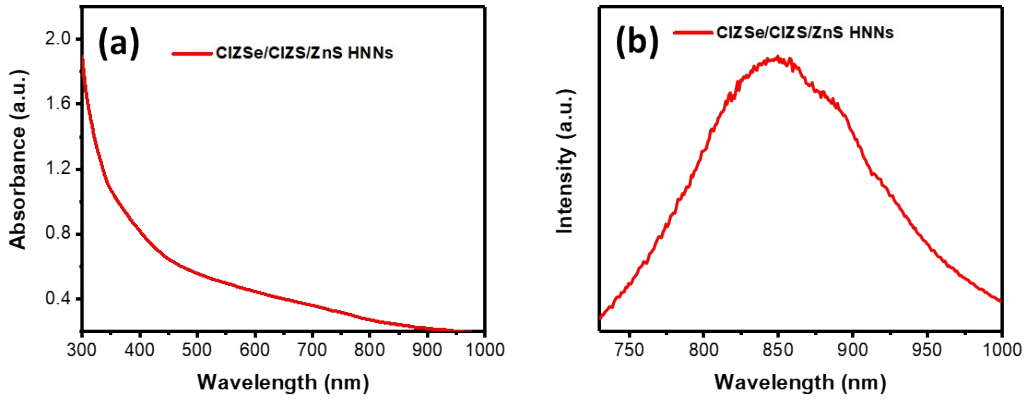

**Fig S3.** (a) UV-Vis and (b) PL spectra of CIZSe/CIZS/ZnS HNNs.

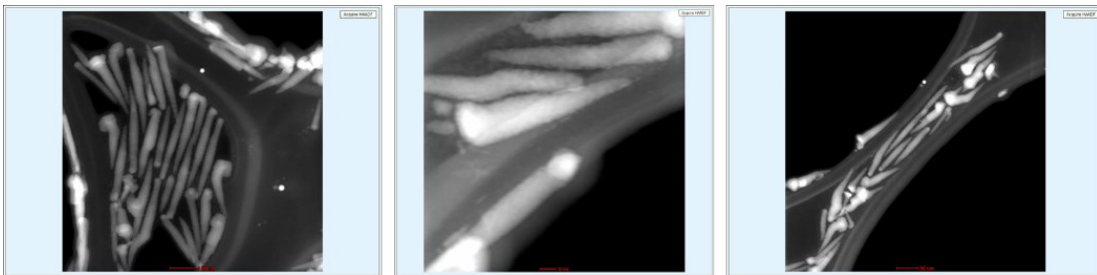

**Fig S4.** STEM images of CIZSe/CIZS/ZnS HNNs (Cu:In:Zn = 1:2:3).

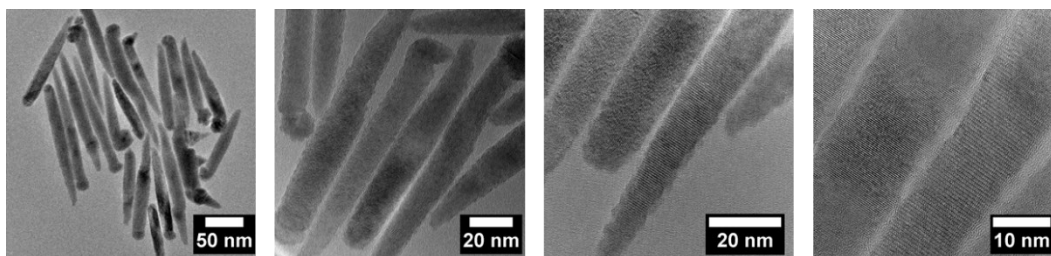

**Fig S5.** TEM images of CIZSe/CIZS/ZnS HNNs (Cu:In:Zn = 1:2:3).

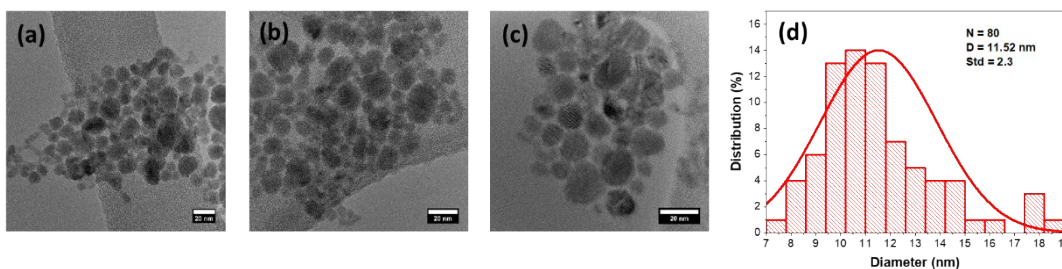

**Fig S6.** (a-c) TEM images of CIZSe/CIZS QDs (Cu:In:Zn = 1:3:2). (d) Diameter histogram of the sample.

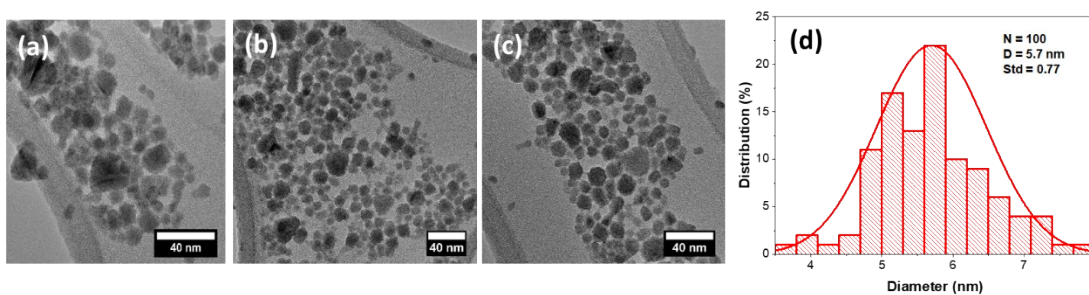

**Fig S7.** (a-c) TEM images of CIZSe/CIZS QDs (Cu:In:Zn = 1:1:3). (d) Diameter histogram of the sample.

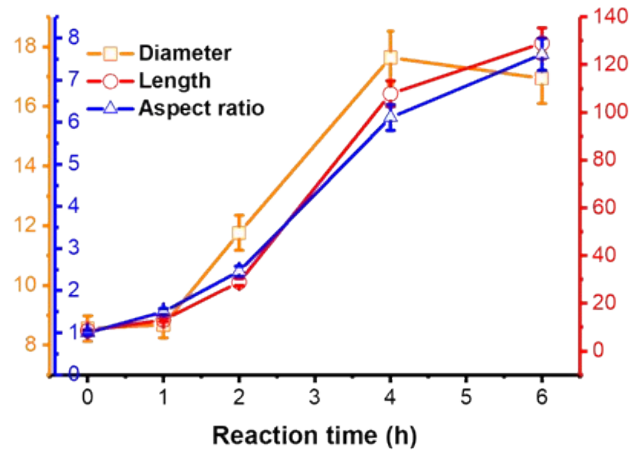

**Fig S8.** The change of diameter, length and aspect ratio of the HNN structure during reaction.

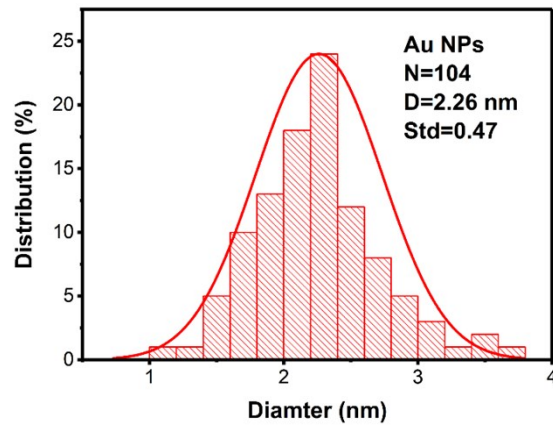

**Fig S9.** Diameter histogram of the Au particles that deposited on the HNN surface.

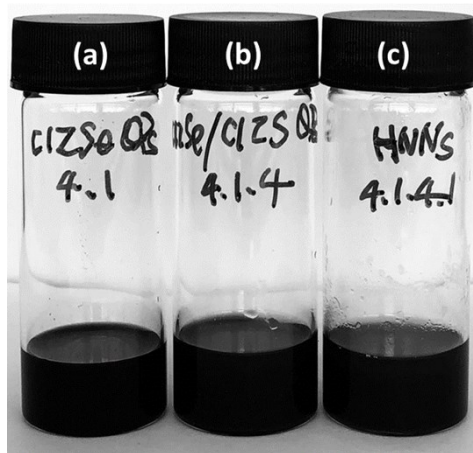

**Figure S10.** Pictures of (a) CIZSe QDs, (b) CIZSe/CIZS QDs and (c) CIZSe/CIZS/ZnS HNNs after being stored in the fridge for three months.
